# Supplementary material for: Correlation between composition and hydrogen storage behaviors of the Li2NH-MgNH combination system
Source: Royal Society of Chemistry journal article supplement (doi:10.1039/c1dt10108k), 2011-01-01
Supplement: c1dt10108k.pdf [file c1dt10108k.pdf]

### Supplementary Information:

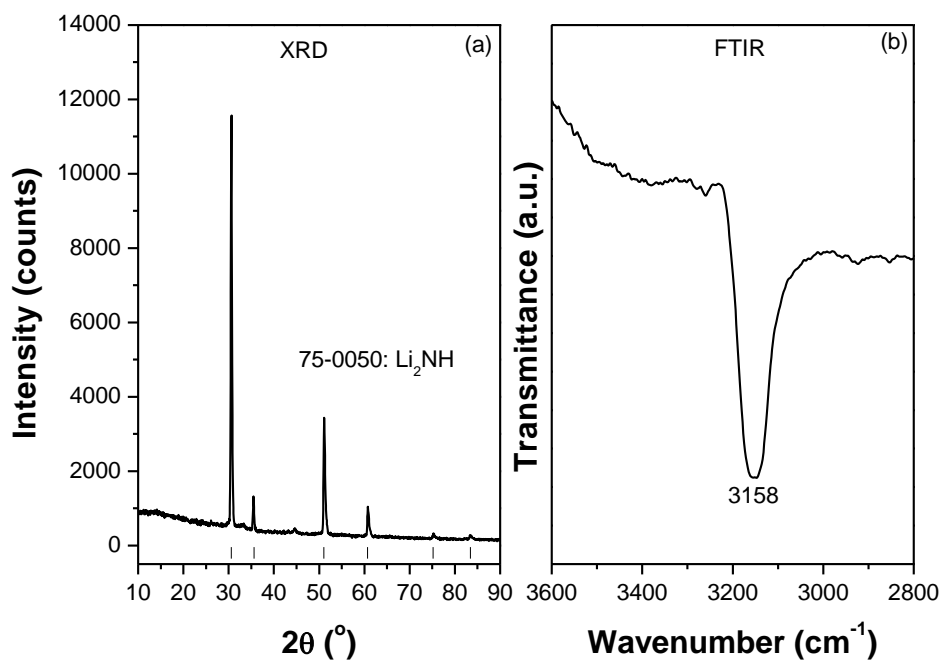

Fig. S1 XRD pattern (a) and FTIR spectrum (b) of the as-prepared  $\text{Li}_2\text{NH}$

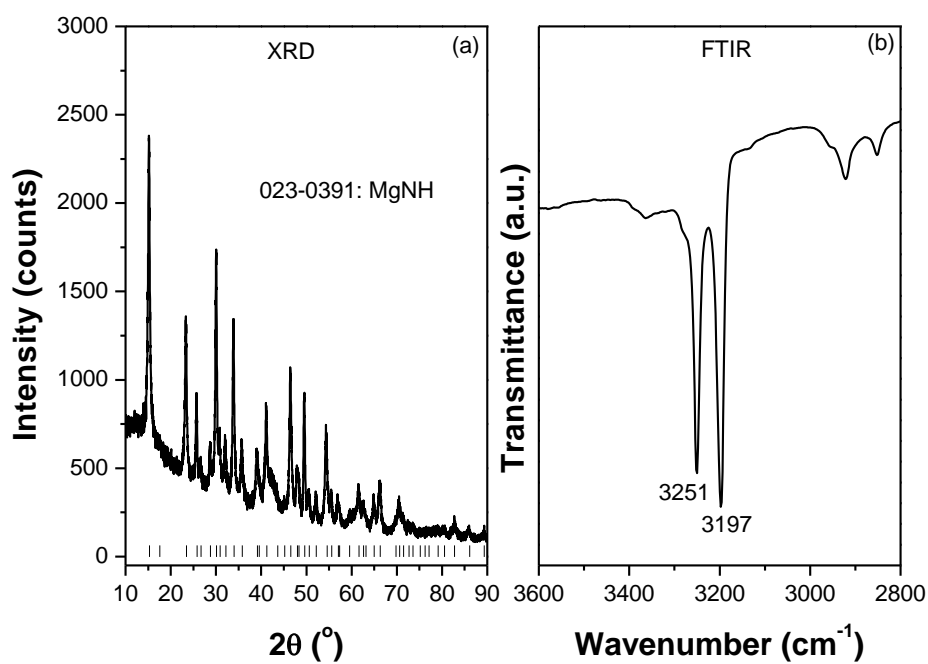

Fig. S2 XRD pattern (a) and FTIR spectrum (b) of the as-prepared  $\text{MgNH}$

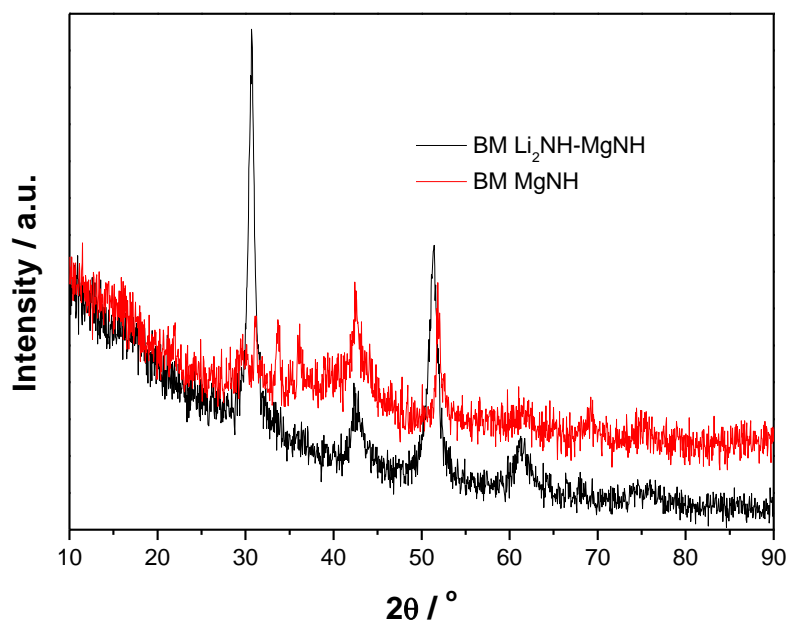

Fig. S3 Comparison on XRD patterns of the as-milled MgNH and Li<sub>2</sub>NH-MgNH

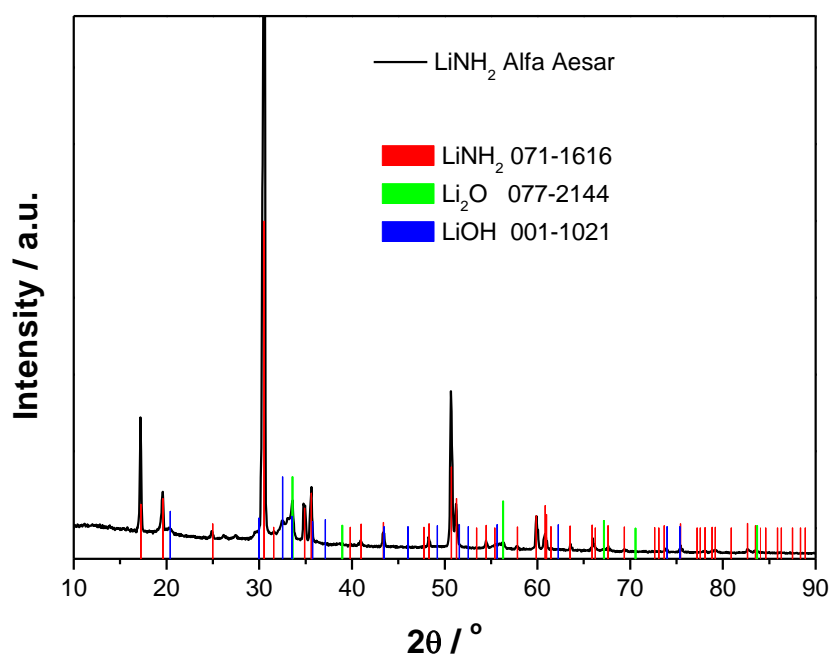

Fig. S4 XRD pattern of the as-received LiNH<sub>2</sub>

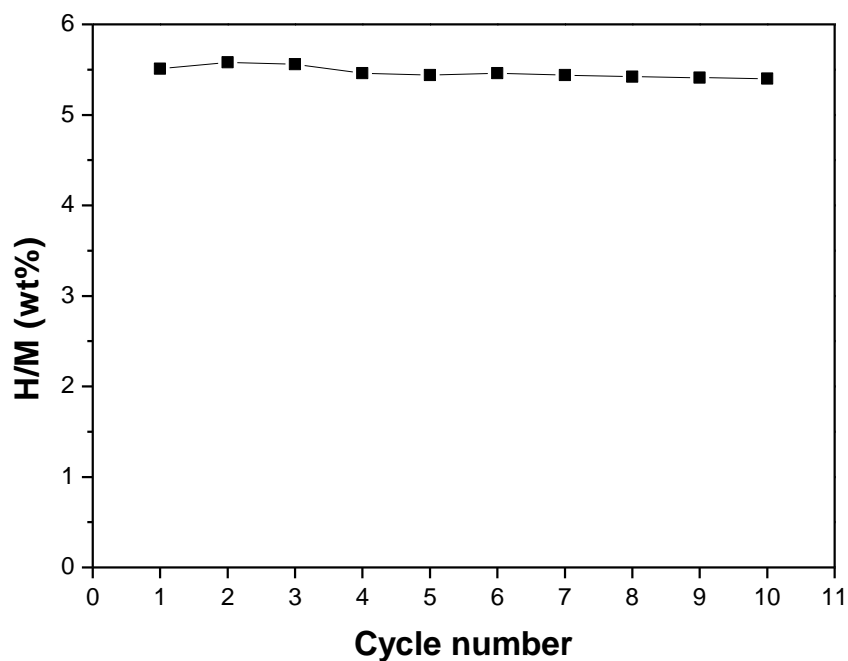

Fig. S5 Hydrogen desorption capacities of the hydrogenated  $\text{Li}_2\text{NH}$ -0.5MgNH sample within first ten cycles

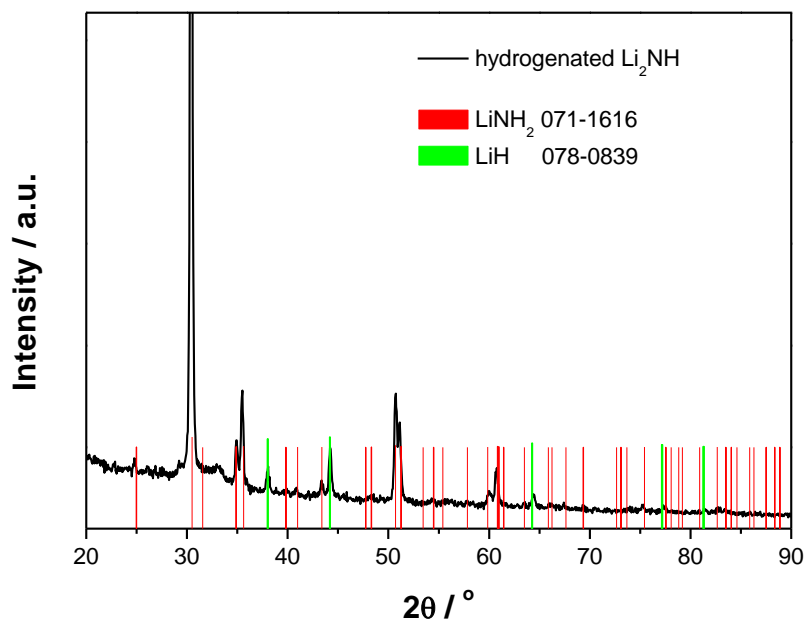

Fig. S6 A full profile analysis on XRD pattern of the hydrogenated  $\text{Li}_2\text{NH}$  sample

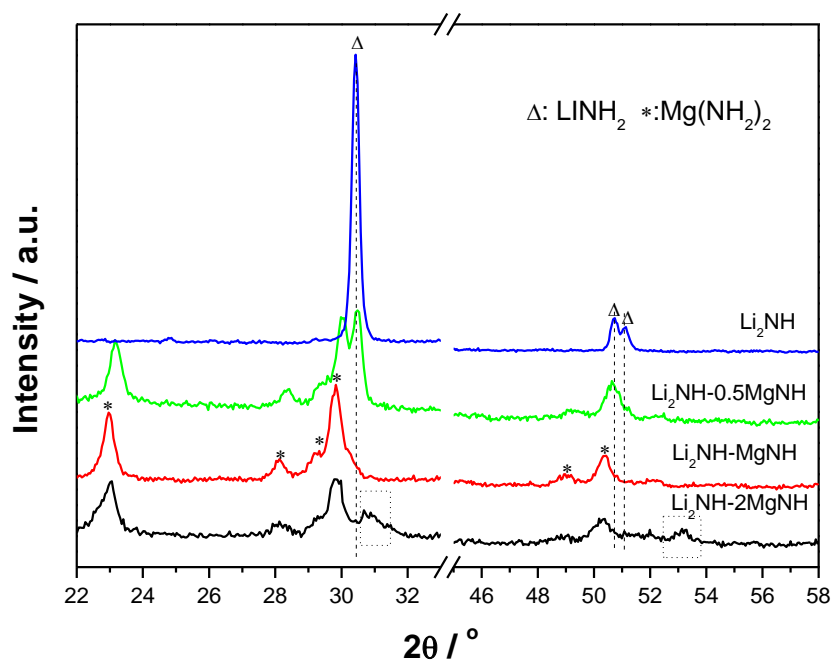

Fig. S7 XRD patterns with enlarged scale for the hydrogenated  $\text{Li}_2\text{NH}-x\text{MgNH}$  samples

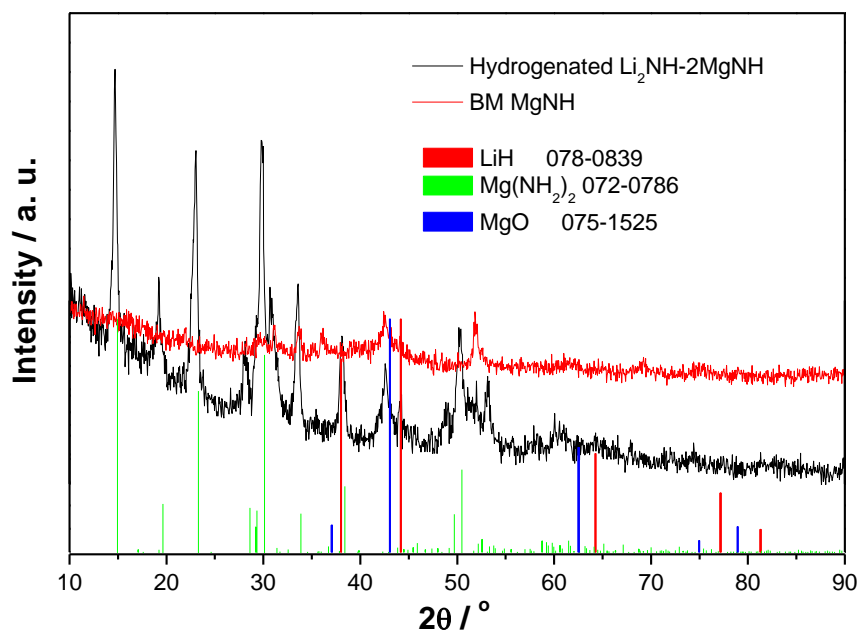

Fig. S8 A full profile analysis on XRD pattern of the hydrogenated  $\text{Li}_2\text{NH}-2\text{MgNH}$  samples

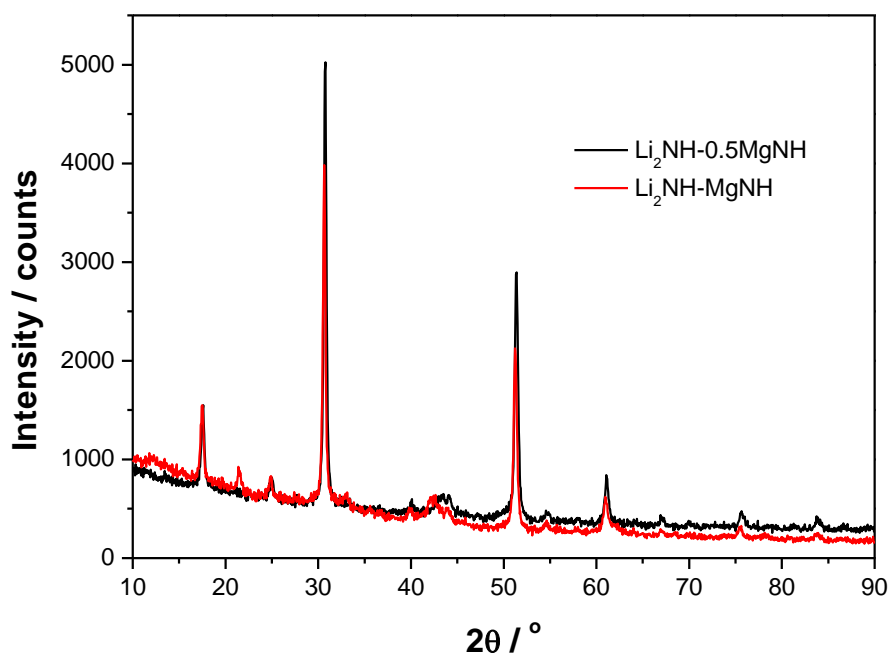

Fig. S9 Comparison of XRD patterns of the  $\text{Li}_2\text{NH}-0.5\text{MgNH}$  and  $\text{Li}_2\text{NH}-\text{MgNH}$  samples after one hydrogenation/dehydrogenation cycle

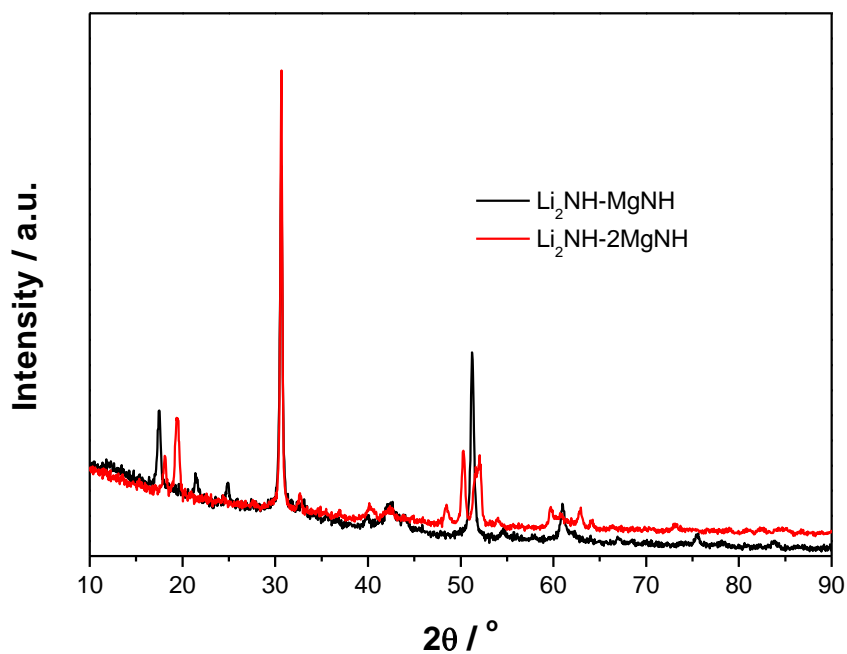

Fig. S10 Comparison of XRD patterns of the  $\text{Li}_2\text{NH}-\text{MgNH}$  and  $\text{Li}_2\text{NH}-2\text{MgNH}$  samples after one hydrogenation/dehydrogenation cycle
